# Supplementary material for: Web-Based Textual Analysis of Free-Text Patient Experience Comments From a Survey in Primary Care
Source: PubMed Central journal article supplement (PMC4439523; doi:10.2196/medinform.3783), 2015-05-06
Supplement: medinform_v3i2e20_app1.pdf [file medinform_v3i2e20_app1.pdf]

# TagCrowd

Create your own tag cloud from any text to visualize word frequency.

[Start Over](#) [Blog](#) [Help](#) [Contact](#) [Patrons of TagCrowd](#)

Choose your text source:

[Paste Text](#) [Web Page URL](#) [Upload File](#)

Upload a file:  
plain text, 5 megabyte max  ExeterCamb...owTime.txt

[Visualize!](#)

Options:

Language of text:

Ignore common words in this language

Maximum number of words to show?

25 - 100 is a good range

Minimum frequency?

Don't show infrequent words

Show frequencies?  no  yes

Show word count next to each word

Group similar words? (English only)  no  yes

eg: learn, learned, learning -> learn

Convert to lowercase?  lowercase  original

eg: PhD -> phd, FBI -> fbi, Rio -> rio

Don't show these words:

Exclude unwanted words.

## Tag Crowd: 1) Select settings



### Explore

- Visualizations
- Data sets
- Comments
- Topic centers

### Participate

- Create a visualization
- Upload a data set
- Create a topic center
- Register

### Learn more

- Quick start
- Visualization types
- About Many Eyes
- Privacy
- Blog

Visualizations Search

### Try our featured visualizations

#### Military, health and education Expenditures

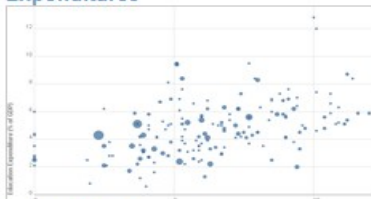

In relation to GDP  
by Jockturn

#### Threatened and Endangered Wildlife and Plant Species

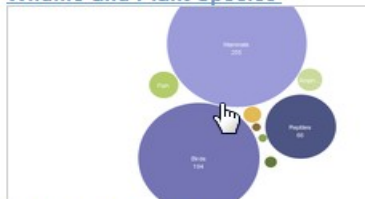

2011 - Endangered species  
by LJean

#### KFC franchises worldwide (excl US and China)

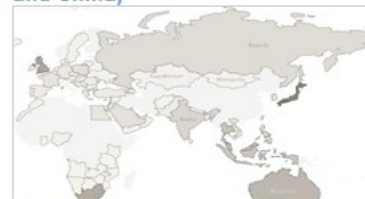

2013  
by brenda233

#### Education Levels by State

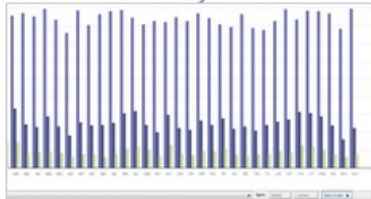

Based on census data  
by smgoode

#### HIDTA By County

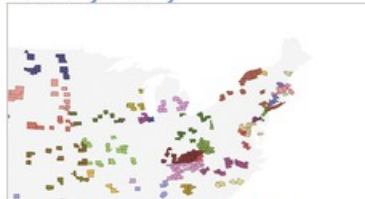

High Intensity Drug Trafficking Areas  
by afarmand

#### Most Popular Baby Names

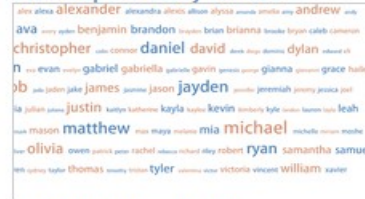

2007 to 2011, New York City  
by doubledown2121

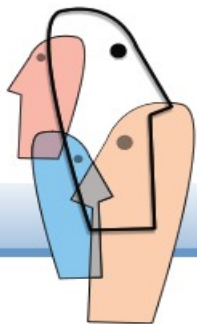

Try out the newest version of IBM Many Eyes! Try ManyEyes v2 >

New site design and layout

Expertise on the Expert Eyes blog

New visualization options

# Many Eyes welcome page

Your visualization will look like this:

1 word  2 word  compare

Search :

Showing 143 Out of 143

abdicated government absolute despotism absolute rule absolute tyranny ages sexes alliances establish altering fundamentally arbitrary government armed troops assembled appealing barbarous ages bear arms british brethren british crown candid world cases whatsoever charters abolishing civil power civilized nation coasts burnt colonies solemnly common kindred conclude peace congress assembled contract alliances created equal death desolation decent respect direct object dissolved representative divine providence domestic insurrections english laws equal station establish commerce establishing judiciary excited domestic experience hath fellow citizens firm reliance fit instrument foreign mercenaries foreigners refusing free people free system full power future security general congress god entitle good people government laying governments long happiness prudence hath shewn high seas houses repeatedly human events humble terms imposing taxes independent states indian savages inevitably interrupt judges dependent judiciary powers jurisdiction foreign large armies large bodies large districts laws giving legislative bodies legislative powers levy war life liberty long established long time long train made judges mankind enemies mankind requires manly firmness men deriving merciless indian military independent mock trial mutually pledge native justice neighbouring province new appropriations new government new guards new offices object evinces operation till pass laws patient sufferance peace contract peace friends peace standing perfidy scarcely places unusual political bands political connection powers incapable present king pressing importance pretended legislation pretended offences provide new province establishing public good public records purpose obstructing pursuing invariably quartering large repeated injuries repeated injury repeated petitions representative houses rights governments sacred honor scarcely paralleled seas ravaged sole purpose solemnly publish standing armies state remaining supreme judge time exposed time transporting totally dissolved totally unworthy transporting large unalienable rights undistinguished destruction united colonies united states unusual uncomfortable unwarrantable jurisdiction usurpations pursuing utterly neglected valuable laws waging war war conclude

sets

2011

## Example of two-word text cloud

# VOYANT

see through your text

**Add Texts**

Type in one ore more URLs on separate lines or paste in a full text.

*Voyant Tools is a web-based reading and analysis environment for digital texts. Find out more.*

Opening page of Voyant tools

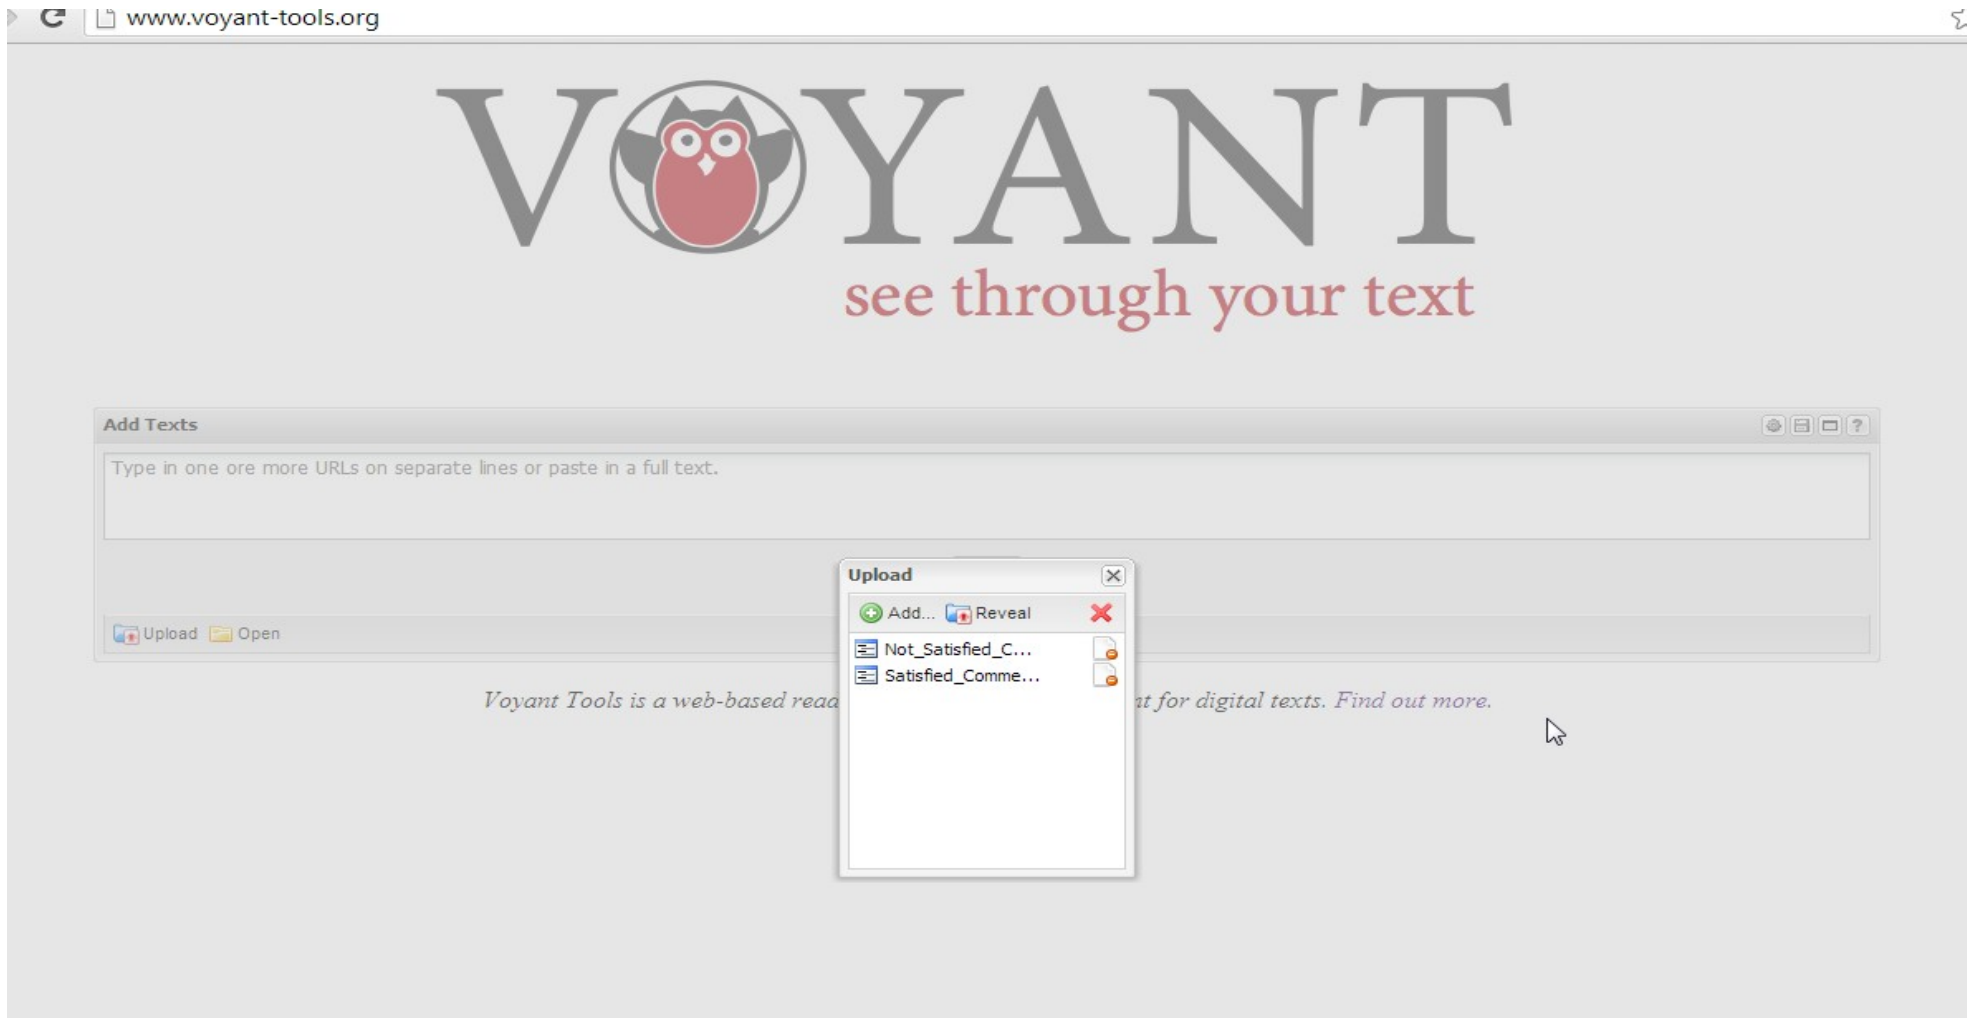

## Uploading text files to Voyant tools

Voyant Tools: Reveal Your Texts

### Cirrus

Summary

- There are 2 documents in this corpus with a total of **140,158 words** and **6,630 unique words**.
- Documents ordered by number of words (/): Satisfied\_Comments\_All (115,418), Not\_Satisfied\_Comments\_Al... (24,740)
- Documents ordered by vocabulary density (\): Not\_Satisfied\_Comments\_Al... (111.6), Satisfied\_Comments\_All (51.3).
- Most **frequent words** in the corpus: **doctor** (1,319), **surgery** (1,120), **appointment** (1,026), **doctors** (787), **time** (769). More...
- Words with **notable peaks in frequency** across the corpus: **told** (190 \), **think** (195 /), **book** (200 /), **weeks** (200 \), **seen** (204 \). More...
- Distinctive words** (compared to the rest of the corpus)
  - Not\_Satisfied\_Comments\_Al...: **appointment** (214), **doctor** (263), **feel** (86), **rude** (37), **symptoms** (30). More...
  - Satisfied\_Comments\_All: **service** (534), **good** (615), **excellent** (358), **surgery** (969), **helpful** (388). More...

Words in the Entire Corpus

| Word         | Count | Trend |
|--------------|-------|-------|
| doctor       | 1,319 | \     |
| surgery      | 1,120 | /     |
| appointment  | 1,026 | \     |
| doctors      | 787   | /     |
| time         | 769   | /     |
| practice     | 745   | /     |
| good         | 672   | /     |
| gp           | 610   | \     |
| service      | 572   | /     |
| appointments | 481   | /     |
| staff        | 444   | /     |
| dr           | 423   | \     |
| helpful      | 419   | /     |
| like         | 416   | \     |

### Word Trends

Relative Frequencies

1) Not\_Sat... 2) Satis f...

Relative | Segments | Search | collapse terms

### Keywords in Context

### Words in Documents

| Word         | Count | Relative |
|--------------|-------|----------|
| doctor       | 263   | 106.31   |
| appointment  | 214   | 86.50    |
| surgery      | 151   | 61.03    |
| doctors      | 137   | 55.38    |
| time         | 132   | 53.35    |
| gp           | 117   | 47.29    |
| practice     | 90    | 36.38    |
| like         | 86    | 34.76    |
| feel         | 86    | 34.76    |
| dr           | 77    | 31.12    |
| appointments | 75    | 30.32    |
| work         | 59    | 23.85    |
| phone        | 59    | 23.85    |
| wait         | 58    | 23.44    |
| patients     | 58    | 23.44    |

Voyant Tools, Stéfán Sinclair & Geoffrey Rockwell (@2014) Privacy v. 1.0 beta (4688)

# Voyant tools overview

## Voyant Tools: Reveal Your Texts

### Summary

- There are **2 documents** in this corpus with a total of **140,158 words** and **6,630 unique words**.
- Documents ordered by number of words ( / ): [Satisfied\\_Comments\\_All](#) (115,418), [Not\\_Satisfied\\_Comments\\_Al...](#); (24,740)
- Documents ordered by vocabulary density ( \ ): [Not\\_Satisfied\\_Comments\\_Al...](#); (111.6), [Satisfied\\_Comments\\_All](#) (51.3).
- Most **frequent words** in the corpus: [doctor](#) (1,319), [surgery](#) (1,120), [appointment](#) (1,026), [doctors](#) (787), [time](#) (769). [More...](#)
- Words with **notable peaks in frequency** across the corpus: [told](#) (190 \), [think](#) (195 /), [book](#) (200 /), [weeks](#) (200 \), [seen](#) (204 \). [More...](#)
- **Distinctive words** (compared to the rest of the corpus)
  1. [Not\\_Satisfied\\_Comments\\_Al...](#);: [appointment](#) (214), [doctor](#) (263), [feel](#) (86), [rude](#) (37), [symptoms](#) (30). [More...](#)
  2. [Satisfied\\_Comments\\_All](#): [service](#) (534), [good](#) (615), [excellent](#) (358), [surgery](#) (969), [helpful](#) (388). [More...](#)

## Voyant tools: Distinctive words



Voyant Tools: Reveal Your Texts

### Keywords in Context

|   | Left                                 | Keyword | Right                                |
|---|--------------------------------------|---------|--------------------------------------|
| + | an appointment * The staff are       | rude    | * They stand by their own            |
| + | partners in this practice is         | rude    | and aggressive - a good doctor       |
| + | this GP, they were too               | rude    | . Another of the GPs is              |
| + | the surgery can be quite             | rude    | and last time I saw                  |
| + | them again. Also receptionist is     | rude    | and very unhelpful and causes        |
| + | one receptionist who is quite        | rude    | and disorganised and seems mud...    |
| + | of them to be quite                  | rude    | . I feel that these drs              |
| + | weeks time. The receptionists are    | rude    | - they also ask if it's              |
| + | ...check ups.Receptionists are frequ | rude    | and dismissive. I often feel         |
| + | ...an appointment. The receptionists | rude    | , loud, discuss and ask personal     |
| + | well.The reception staff are         | rude    | & the doctors don't take you         |
| + | at the surgery is very               | rude    | . They make patients feel unimpor... |

Page 1 of 2 | Context Preview | rude

Voyant Tools, Stéfan Sinclair & Geoffrey Rockwell (©2014) Privacy v. 1.0 (?)

# Voyant tools: Keywords in context (KWIC)
