# Supplementary material for: Web-Based Textual Analysis of Free-Text Patient Experience Comments From a Survey in Primary Care
Source: PubMed Central journal article supplement (PMC4439523; doi:10.2196/medinform.3783), 2015-05-06
Supplement: medinform_v3i2e20_app2.pdf [file medinform_v3i2e20_app2.pdf]

# SEEING THE DOCTOR

Please answer the questions below by putting an ✕ in ONE BOX for each question unless more than one answer is allowed (these questions are clearly marked). We will keep your answers completely confidential.

## A. APPOINTMENTS AT YOUR GP SURGERY OR HEALTH CENTRE

**Q1** How do you normally book your appointments to see a doctor or nurse at this GP surgery or health centre?

Please ✕ all the boxes that apply to you

- |                                         |                                        |
|-----------------------------------------|----------------------------------------|
| <input type="checkbox"/> In person      | <input type="checkbox"/> Online        |
| <input type="checkbox"/> By phone       | <input type="checkbox"/> Digital TV    |
| <input type="checkbox"/> By fax machine | <input type="checkbox"/> Doesn't apply |

**Q2** Which of the following methods would you prefer to use to book appointments at this GP surgery or health centre?

Please ✕ all the boxes that apply to you

- |                                         |                                        |
|-----------------------------------------|----------------------------------------|
| <input type="checkbox"/> In person      | <input type="checkbox"/> Online        |
| <input type="checkbox"/> By phone       | <input type="checkbox"/> Digital TV    |
| <input type="checkbox"/> By fax machine | <input type="checkbox"/> No preference |

## B. GETTING THROUGH ON THE PHONE

Now please think about times you have phoned this GP surgery or health centre in the past 6 months.

**Q3** In the past 6 months, how easy have you found the following?

Please put an ✕ in one box for each row

|                                         | Haven't tried            | Very easy                | Fairly easy              | Not very easy            | Not at all easy          | Don't know               |
|-----------------------------------------|--------------------------|--------------------------|--------------------------|--------------------------|--------------------------|--------------------------|
| Getting through on the phone .....      | <input type="checkbox"/> | <input type="checkbox"/> | <input type="checkbox"/> | <input type="checkbox"/> | <input type="checkbox"/> | <input type="checkbox"/> |
| Speaking to a doctor on the phone ..... | <input type="checkbox"/> | <input type="checkbox"/> | <input type="checkbox"/> | <input type="checkbox"/> | <input type="checkbox"/> | <input type="checkbox"/> |
| Speaking to a nurse on the phone .....  | <input type="checkbox"/> | <input type="checkbox"/> | <input type="checkbox"/> | <input type="checkbox"/> | <input type="checkbox"/> | <input type="checkbox"/> |
| Getting test results on the phone ..... | <input type="checkbox"/> | <input type="checkbox"/> | <input type="checkbox"/> | <input type="checkbox"/> | <input type="checkbox"/> | <input type="checkbox"/> |

## C. SEEING A DOCTOR

**Q4** In the past 6 months, have you tried to see a doctor fairly quickly?

By 'fairly quickly' we mean on the same day or in the next 2 weekdays the GP surgery or health centre was open.

- Yes..... Please go to Q5  
 No ..... Please go to Q7  
 Can't remember.... Please go to Q7

**Q5** Think about the last time you tried to see a doctor fairly quickly. Were you able to see a doctor on the same day or in the next 2 weekdays the GP surgery or health centre was open?

- Yes..... Please go to Q7
- No ..... Please go to Q6
- Can't remember.... Please go to Q7

**Q6** If you couldn't be seen within the next 2 weekdays the GP surgery or health centre was open, why was that?

Please **x** all the boxes that apply to you

- There weren't any appointments
- The times offered didn't suit me
- The appointment was with a doctor I didn't want to see
- I could have seen a nurse but I wanted to see a doctor
- I was offered an appointment at a different branch of my surgery
- Another reason
- Can't remember

**Q7** In the past 6 months, have you tried to book ahead for an appointment with a doctor? By 'booking ahead' we mean booking an appointment more than 2 full weekdays in advance.

- Yes..... Please go to Q8
- No ..... Please go to Q9
- Can't remember.... Please go to Q9

**Q8** Last time you tried to, were you able to get an appointment with a doctor more than 2 full weekdays in advance?

- Yes
- No
- Can't remember

## D. ARRIVING FOR YOUR APPOINTMENT

**Q9** How easy do you find it to get into the building at this GP surgery or health centre?

- Very easy
- Fairly easy
- Not very easy
- Not at all easy

**Q10** How clean is this GP surgery or health centre?

- Very clean
- Fairly clean
- Not very clean
- Not at all clean
- Don't know

**Q11** In the reception area, can other patients overhear what you say to the receptionist?

- Yes, but I don't mind
- Yes, and I am not happy about it
- No, other patients can't overhear
- Don't know

**Q12** How helpful do you find the receptionists at this GP surgery or health centre?

- Very helpful
- Fairly helpful
- Not very helpful
- Not at all helpful

**Q13 How long after your appointment time do you normally wait to be seen?**

- I don't normally have appointments at a particular time
- I am normally seen at my appointment time
- Less than 5 minutes
- 5 to 15 minutes
- 16 to 30 minutes
- More than 30 minutes
- Can't remember

**Q14 How do you feel about how long you normally have to wait?**

- I don't normally have to wait too long
- I have to wait a bit too long
- I have to wait far too long
- No opinion/doesn't apply

## E. SEEING THE DOCTOR YOU PREFER

**Q15 Is there a particular doctor you prefer to see at this GP surgery or health centre?**

- Yes..... Please go to Q16
- No ..... Please go to Q18
- There is usually only one doctor in my GP surgery or health centre ..... Please go to Q18

**Q16 How often do you see the doctor you prefer to see?**

- Always or almost always
- A lot of the time
- Some of the time
- Never or almost never
- Not tried at this GP surgery or health centre

**Q17 Was your consultation, which took place on the date referred to in the accompanying letter, with the doctor you prefer to see?**

- Yes
- No

## F. OPENING HOURS

**Q18 How satisfied are you with the hours that this GP surgery or health centre is open?**

- Very satisfied
- Fairly satisfied
- Neither satisfied nor dissatisfied
- Fairly dissatisfied
- Very dissatisfied
- I'm not sure when my GP surgery or health centre is open

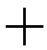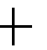

**Q19** As far as you know, is this GP surgery or health centre open...

Please put an **x** in one box for **each** row

|                         | Yes                      | No                       | Sometimes                | Don't know               |
|-------------------------|--------------------------|--------------------------|--------------------------|--------------------------|
| ... before 8am? .....   | <input type="checkbox"/> | <input type="checkbox"/> | <input type="checkbox"/> | <input type="checkbox"/> |
| ... at lunchtime? ..... | <input type="checkbox"/> | <input type="checkbox"/> | <input type="checkbox"/> | <input type="checkbox"/> |
| ... after 6.30pm? ..... | <input type="checkbox"/> | <input type="checkbox"/> | <input type="checkbox"/> | <input type="checkbox"/> |
| ... on Saturdays? ..... | <input type="checkbox"/> | <input type="checkbox"/> | <input type="checkbox"/> | <input type="checkbox"/> |
| ... on Sundays? .....   | <input type="checkbox"/> | <input type="checkbox"/> | <input type="checkbox"/> | <input type="checkbox"/> |

**Q20** Would you like this GP surgery or health centre to open at additional times?

- Yes..... Please go to Q21
- No ..... Please go to Section G

**Q21** Which one of the following additional times would you **most like** this GP surgery or health centre to be open? Please pick **one** answer showing the time you would **most like** it to be open.

- Before 8am At
- lunchtime After
- 6.30pm On a
- Saturday
- On a Sunday

## G. SEEING A DOCTOR AT THE GP SURGERY OR HEALTH CENTRE

Thinking about the consultation, which took place on the date referred to in the letter accompanying this questionnaire...

**Q22** How good was the doctor at each of the following?

Please put an **x** in one box for **each** row

|                                                  | Very good                | Good                     | Neither good nor poor    | Poor                     | Very poor                | Doesn't apply            |
|--------------------------------------------------|--------------------------|--------------------------|--------------------------|--------------------------|--------------------------|--------------------------|
| Giving you enough time .....                     | <input type="checkbox"/> | <input type="checkbox"/> | <input type="checkbox"/> | <input type="checkbox"/> | <input type="checkbox"/> | <input type="checkbox"/> |
| Asking about your symptoms .....                 | <input type="checkbox"/> | <input type="checkbox"/> | <input type="checkbox"/> | <input type="checkbox"/> | <input type="checkbox"/> | <input type="checkbox"/> |
| Listening to you .....                           | <input type="checkbox"/> | <input type="checkbox"/> | <input type="checkbox"/> | <input type="checkbox"/> | <input type="checkbox"/> | <input type="checkbox"/> |
| Explaining tests and treatments .....            | <input type="checkbox"/> | <input type="checkbox"/> | <input type="checkbox"/> | <input type="checkbox"/> | <input type="checkbox"/> | <input type="checkbox"/> |
| Involving you in decisions about your care ..... | <input type="checkbox"/> | <input type="checkbox"/> | <input type="checkbox"/> | <input type="checkbox"/> | <input type="checkbox"/> | <input type="checkbox"/> |
| Treating you with care and concern .....         | <input type="checkbox"/> | <input type="checkbox"/> | <input type="checkbox"/> | <input type="checkbox"/> | <input type="checkbox"/> | <input type="checkbox"/> |
| Taking your problems seriously .....             | <input type="checkbox"/> | <input type="checkbox"/> | <input type="checkbox"/> | <input type="checkbox"/> | <input type="checkbox"/> | <input type="checkbox"/> |

**Q23** Did you have confidence and trust in the doctor you saw?

- Yes, definitely
- Yes, to some extent
- No, not at all
- Don't know/can't say

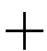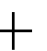

## H. YOUR OVERALL SATISFACTION

**Q24** In general, how satisfied are you with the care you get at this GP surgery or health centre?

- Very satisfied
- Fairly satisfied
- Neither satisfied nor dissatisfied
- Fairly dissatisfied
- Very dissatisfied

**Q25** Would you recommend this GP surgery or health centre to someone who has just moved to your local area?

- Yes, would definitely recommend
- Yes, might recommend
- Not sure
- No, would probably not recommend
- No, would definitely not recommend
- Don't know

## I. SOME QUESTIONS ABOUT YOU

The following questions will help us to see how experiences vary between different groups of the population. We will keep your answers completely confidential.

**Q26** Are you male or female?

- Male
- Female

**Q27** How old are you?

- Under 18
- 18 to 24
- 25 to 34
- 35 to 44
- 45 to 54
- 55 to 64
- 65 to 74
- 75 to 84
- 85 or over

**Q28** Which of these best describes what you are doing at present?

If more than one of these applies to you, please ✕ the main ONE only

- Full-time paid work (30 hours or more each week) ..... Please go to Q29
- Part-time paid work (under 30 hours each week) ..... Please go to Q29
- Full-time education at school, college or university
- Unemployed
- Permanently sick or disabled
- Fully retired from work
- Looking after the home
- Doing something else

Please go to Q31

**Q29** In general, how long does your journey take from home to work (door to door)?

- Up to 30 minutes
- 31 minutes to 1 hour
- More than 1 hour
- I live on site

**Q30** If you need to see a doctor at your GP surgery or health centre during your typical working hours, can you take time away from your work to do this?

- Yes
- No

**Q31** In general, would you say your health is...?

- Excellent
- Very good
- Good
- Fair
- Poor

**Q32** Do you have any of the following long-standing conditions? Please include problems which are due to old age.

Please **x** all the boxes that apply to you

- Deafness or severe hearing impairment
- Blindness or severe visual impairment
- A condition that substantially limits one or more basic physical activities such as walking, climbing stairs, lifting or carrying
- A learning difficulty
- A long-standing psychological or emotional condition
- Other, including any long-standing illness
- No, I do not have a long-standing condition

**Q33** Are you a deaf person who uses sign language?

- Yes
- No

**Q34** Are you a parent or a legal guardian for any children aged under 16 currently living in your home?

- Yes
- No

**Q35** Do you have carer responsibilities for anyone in your household with a long-standing health problem or disability?

- Yes
- No

**Q36** What is your ethnic group?  
Choose one section from A to E below, then select the appropriate option to indicate your ethnic group

**A. White**

- British
- Irish
- Any other White background

**B. Mixed**

- White and Black Caribbean
- White and Black African
- White and Asian
- Any other Mixed background

**C. Asian or Asian British**

- Indian
- Pakistani
- Bangladeshi
- Any other Asian background

**D. Black or Black British**

- Caribbean
- African
- Any other Black background

**E. Chinese or other ethnic group**

- Chinese
- Any other ethnic group

**Q37** Were you born in the UK?

- Yes
- No

**Q38** What language do you speak most often at home?

- English
- Other (please specify)

**THANK YOU FOR YOUR TIME**

**Please return this questionnaire in the pre-paid envelope provided (no stamp is needed).**

**If for any reason you do not have a pre-paid envelope, please return the questionnaire using the freepost address below:**

**GPPS PROGAMME  
FREEPOST RRJE-SLSG-RJSY  
Peninsula College of Medicine and Dentistry  
Primary Care Research Group  
Smeall Building, St Lukes Campus  
Magdalen Road  
Exeter  
EX1 2LU**

This questionnaire has been developed in conjunction with the Peninsula Medical School and the General Practice and Primary Care Research Unit at the University of Cambridge.

**Your practice has asked that we collect any further comments you would like to make about the service they provide.**

---

---

---

---

---

---

---

---

---

---
